# Supplementary material
Source: PubMed Central journal article supplement (PMC5067842)
Supplement: Supp_Table1.pdf [file Supp_Table1.pdf]

## Supplementary Data

SUPPLEMENTARY TABLE S1. SENSITIVITY OF THE U.S./INTERNATIONAL TRANSMISSION NETWORK ANALYSIS TO CLUSTERING PARAMETERS

| <i>Network attribute</i>                                  | <i>Primary analysis</i>                                                                     |                                                                      | <i>Sensitivity analysis</i>                                          |                                                                                             |  |
|-----------------------------------------------------------|---------------------------------------------------------------------------------------------|----------------------------------------------------------------------|----------------------------------------------------------------------|---------------------------------------------------------------------------------------------|--|
| Distance threshold                                        | 1.5%                                                                                        | 1.0%                                                                 | 2.0%                                                                 | 1.5%                                                                                        |  |
| Drug resistance associated mutation codons                | Retained                                                                                    | Retained                                                             | Retained                                                             | Removed                                                                                     |  |
| No. of U.S. sequences that clustered                      | 13,145                                                                                      | 8,010                                                                | 17,494                                                               | 12,822                                                                                      |  |
| % of U.S. sequences that clustered                        | 32                                                                                          | 19                                                                   | 42                                                                   | 31                                                                                          |  |
| No. of U.S. sequences that clustered internationally      | 457                                                                                         | 177                                                                  | 1,019                                                                | 449                                                                                         |  |
| % of U.S. sequences that clustered internationally        | 3.5                                                                                         | 2.2                                                                  | 5.8                                                                  | 3.5                                                                                         |  |
| No. of clusters                                           | 9,814                                                                                       | 7,406                                                                | 11,027                                                               | 9,070                                                                                       |  |
| % of foreign-born persons that linked to country of birth | 35                                                                                          | 47                                                                   | 35                                                                   | 37                                                                                          |  |
| Significant correlates of international linkage           | Race/ethnicity, transmission category, country of birth, year of HIV diagnosis, U.S. region | Race/ethnicity, country of birth, year of HIV diagnosis, U.S. region | Race/ethnicity, country of birth, year of HIV diagnosis, U.S. region | Race/ethnicity, transmission category, country of birth, year of HIV diagnosis, U.S. region |  |
